# Supplementary material for: An ensemble method for identifying consistent models in interpretable machine learning
Source: Research Square preprint supplement (doi:10.21203/rs.3.rs-5784379/v1), 2025-03-14
Supplement: Supplementary file 1 [file a18e44011cf48a50c6c60aaa.docx]

**Supporting information for:**

**An ensemble method for identifying consistent models in interpretable machine learning**

Solomon T. Oyakhire,1¶ Kristin A. Persson1¶

1 Department of Materials Science and Engineering, University of California, Berkeley, California, 94704, United States

¶ Corresponding authors

Email: [kapersson@lbl.gov](mailto:kapersson@lbl.gov), [kristinpersson@berkeley.edu](mailto:kristinpersson@berkeley.edu)

[oyakhire@lbl.gov](mailto:oyakhire@lbl.gov), oyakhire@berkeley.edu


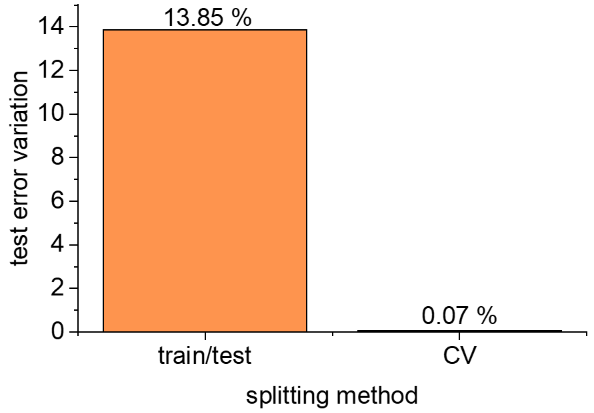


Supporting Figure 1. Test error variation as a function of randomized data splitting method.


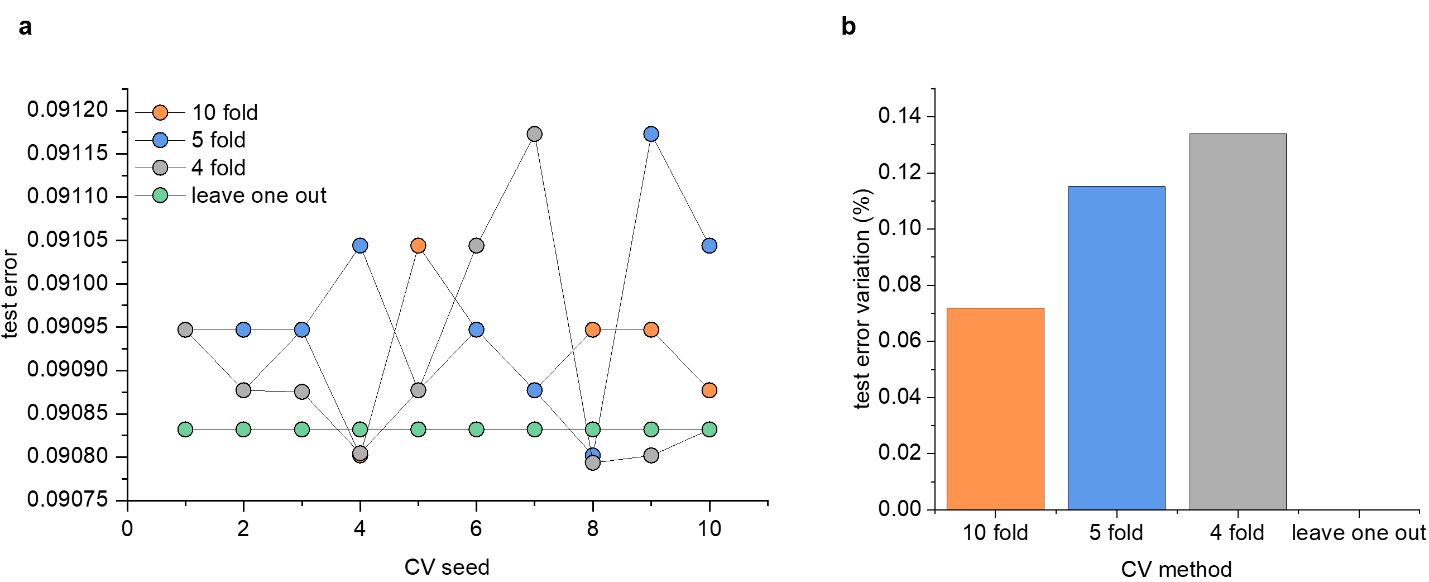


Supporting Figure 2. Effects of varying CV methods on test error a. Variations in test error with CV seed. b. Test error variation as a function of CV method.


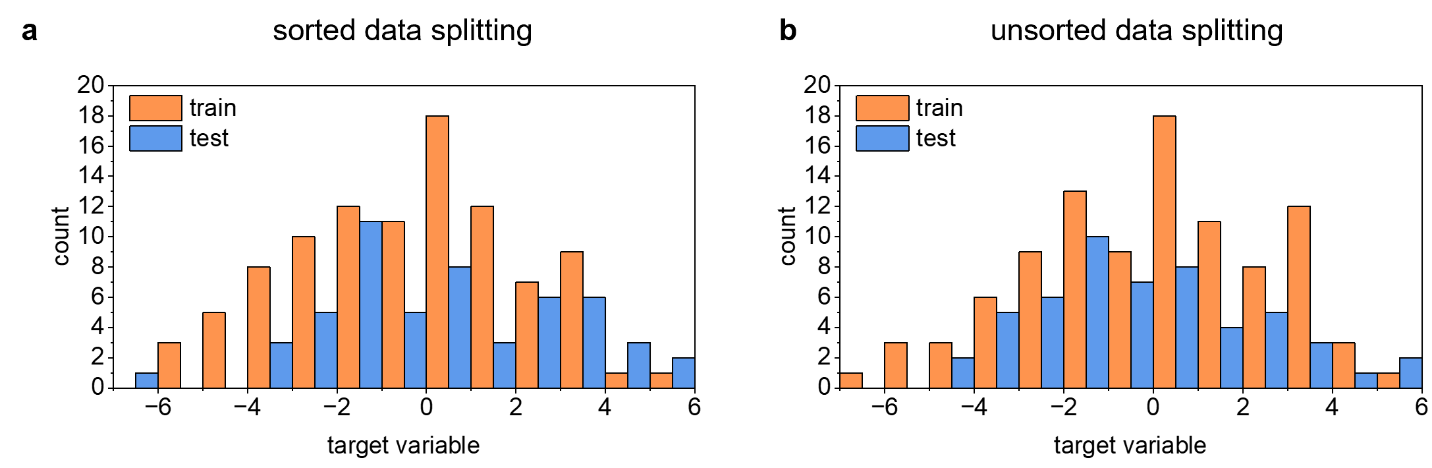


Supporting Figure 3. Distribution of target variable in the training and test set after a) sorted data splitting b) unsorted data splitting.


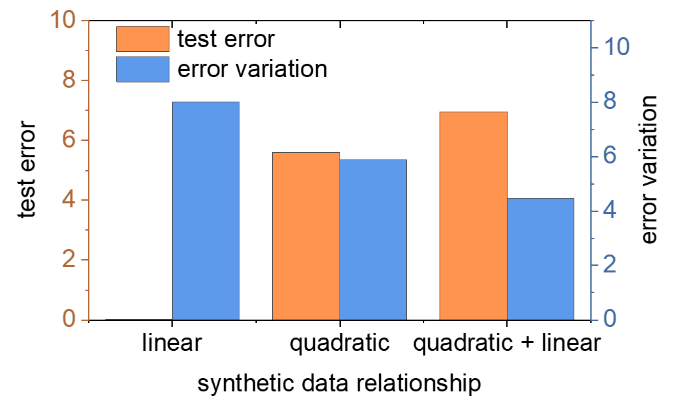


Supporting Figure 4. Test error estimate and variation for varying synthetic data relationships.


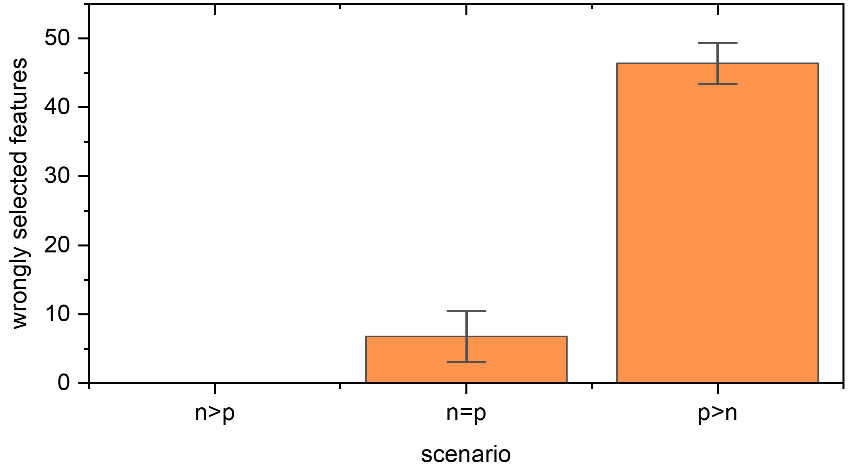


Supporting Figure 5. Number of wrongly selected features as a function of the ratio between number of features (p) and samples (n) for a pairwise correlation coefficient of 0.98 between all features.


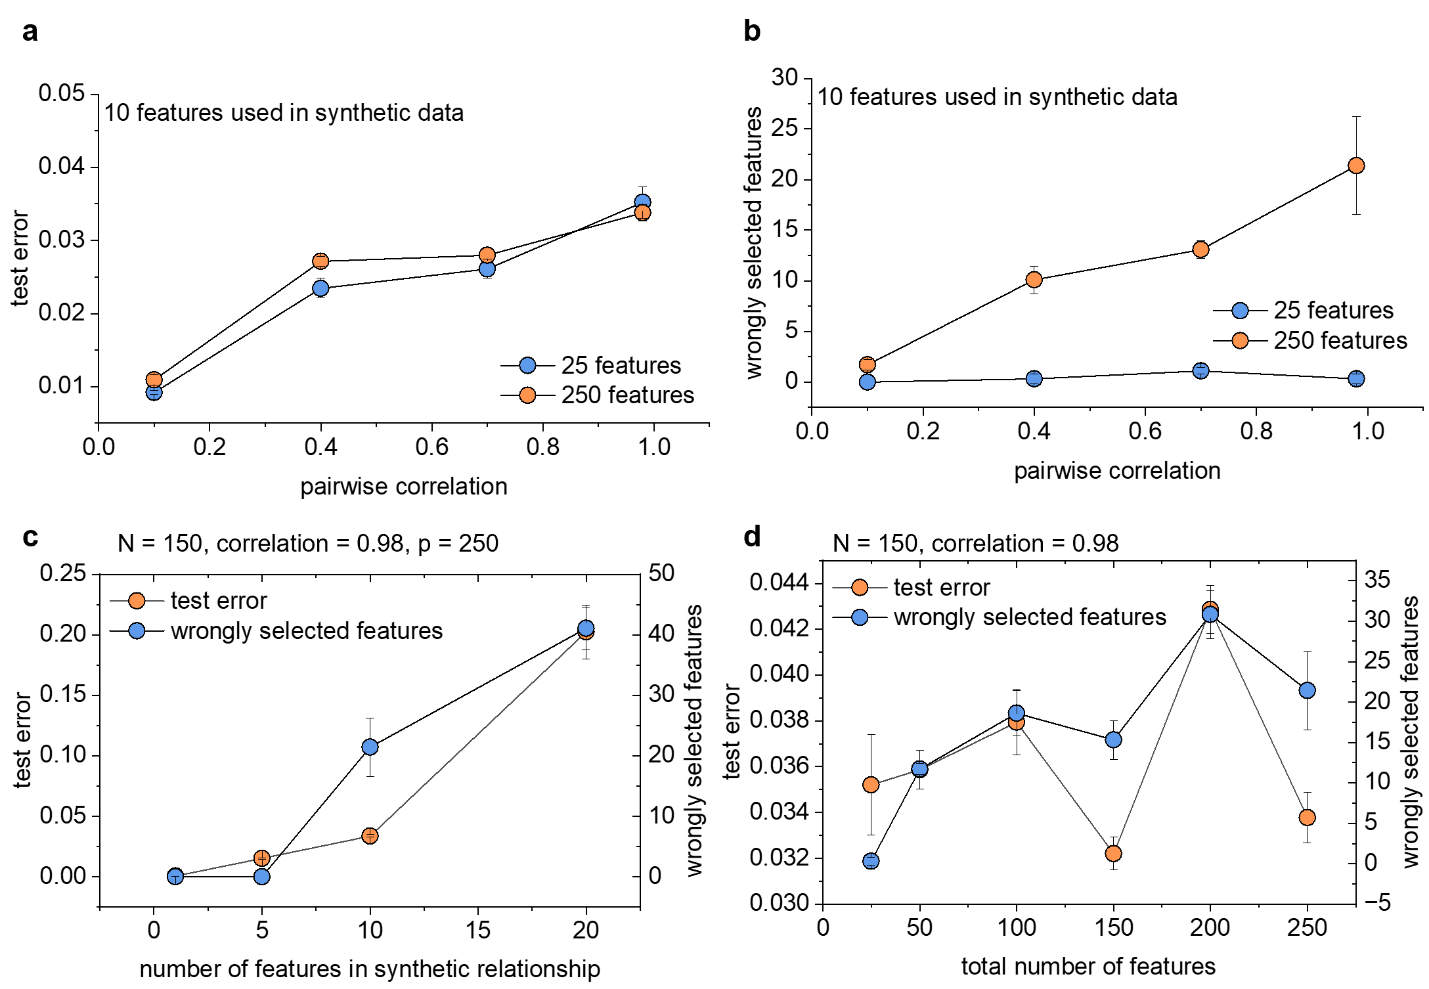


Supporting Figure 6. Effects of correlation and size of feature pool on model performance and feature selection. a. Test error as a function of pairwise correlation. b. Wrongly selected features as a function of pairwise correlation. c. test error and number of wrongly selected features as a function of number of features in synthetic data relationship. d. test error and number of wrongly selected features as functions of the total number of features.


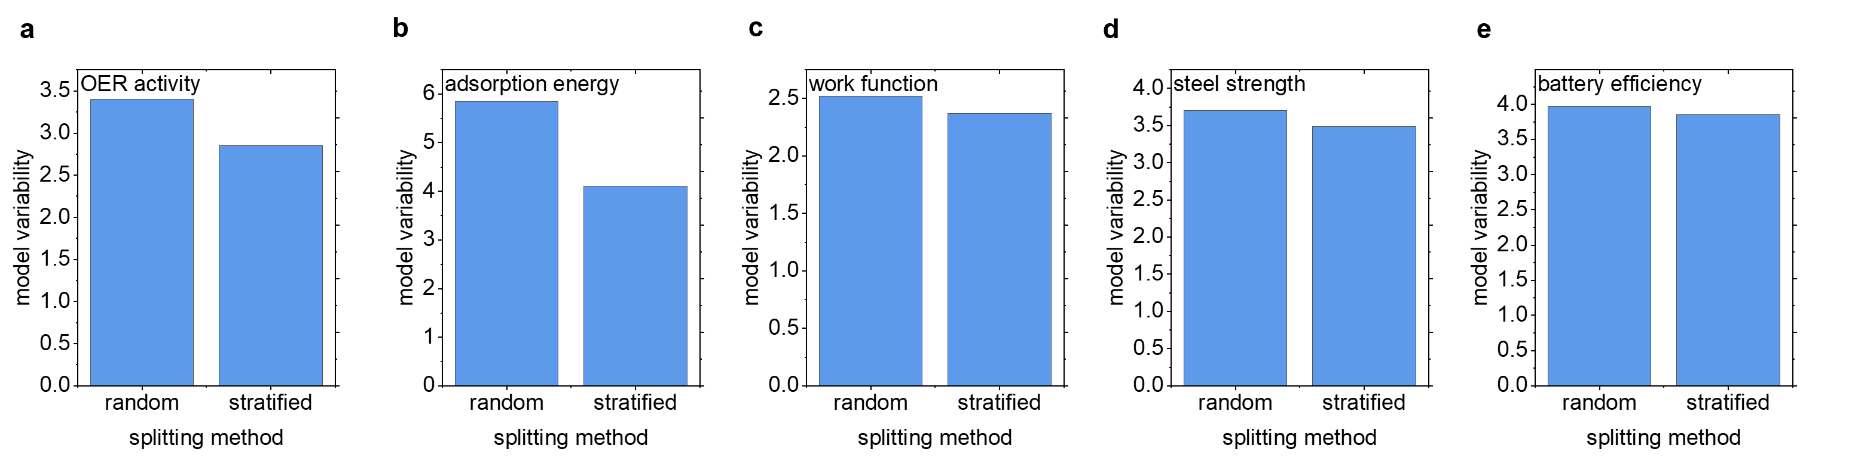


Supporting Figure 7. Model variability as a function of data splitting method for the prediction of a) OER activity, b) adsorption energy, c) work function, d) steel strength, e) battery efficiency.


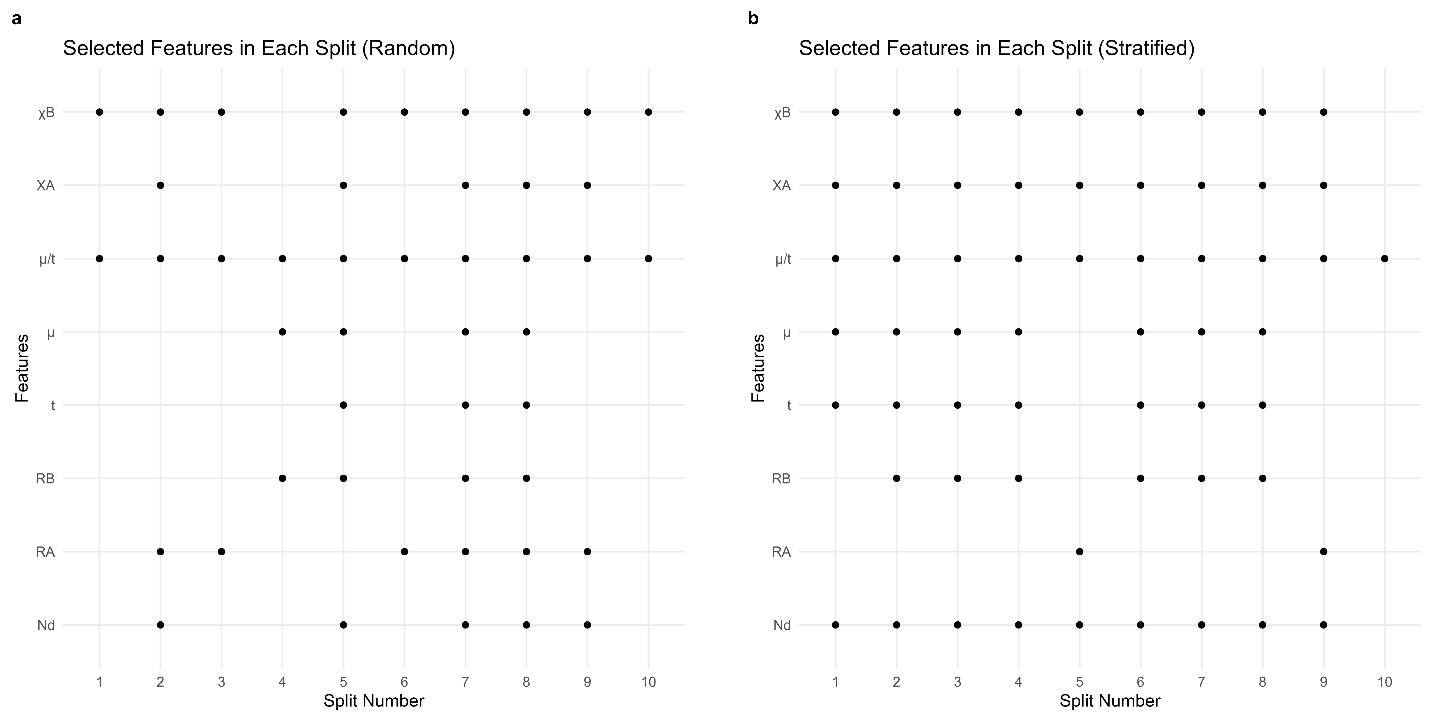


Supporting Figure 8. Variations in selected features with a) random, and b) stratified splitting methods for the OER activity dataset.


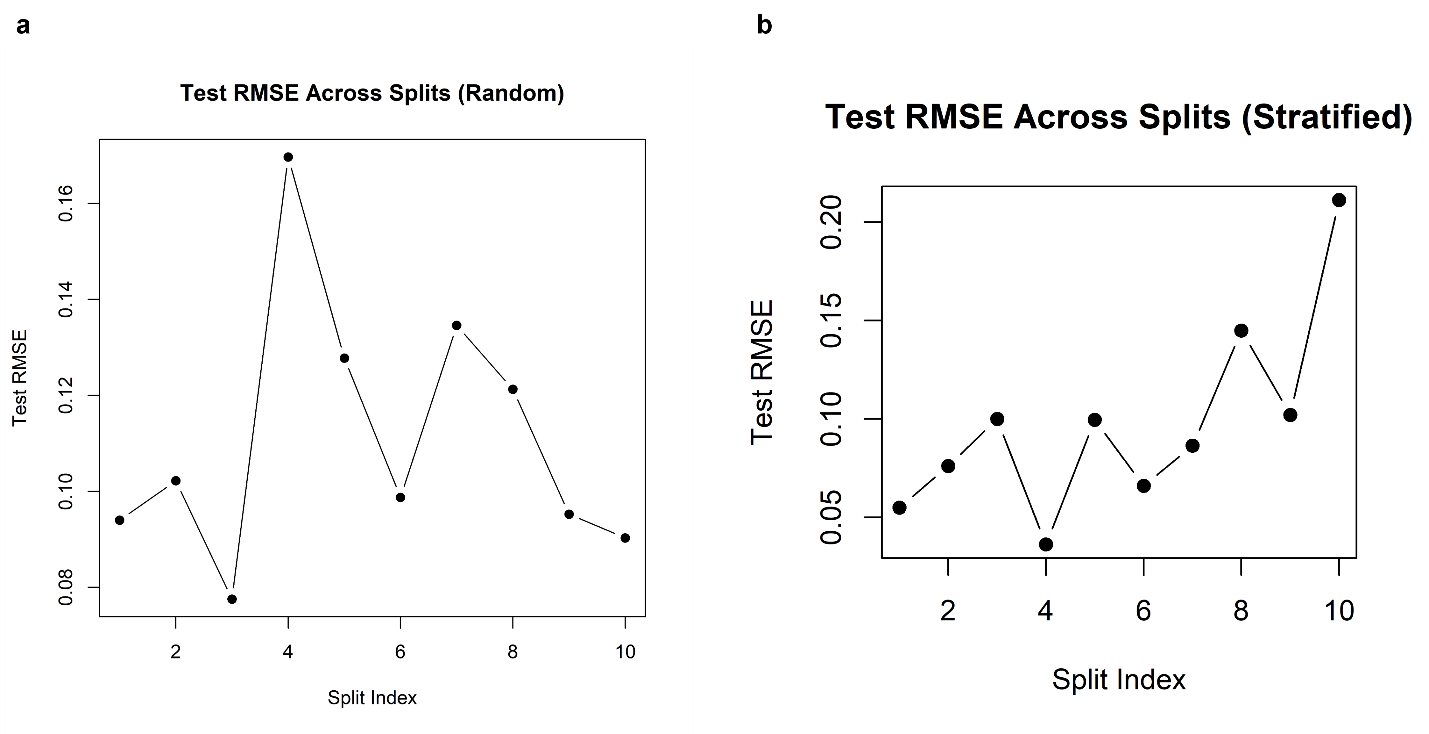


Supporting Figure 9. Variations in test root mean squared error (RMSE) with train-test splits for a) random, and b) stratified splits for the OER activity dataset.


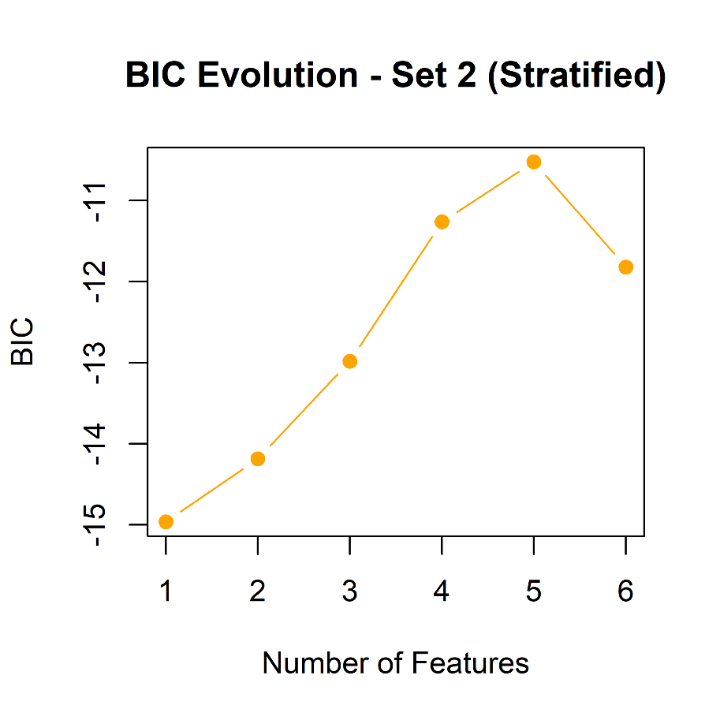


Supporting Figure 10. Bayesian information criterion estimates for a forward stepwise selection algorithm performed on stratified data splits for the OER activity dataset.


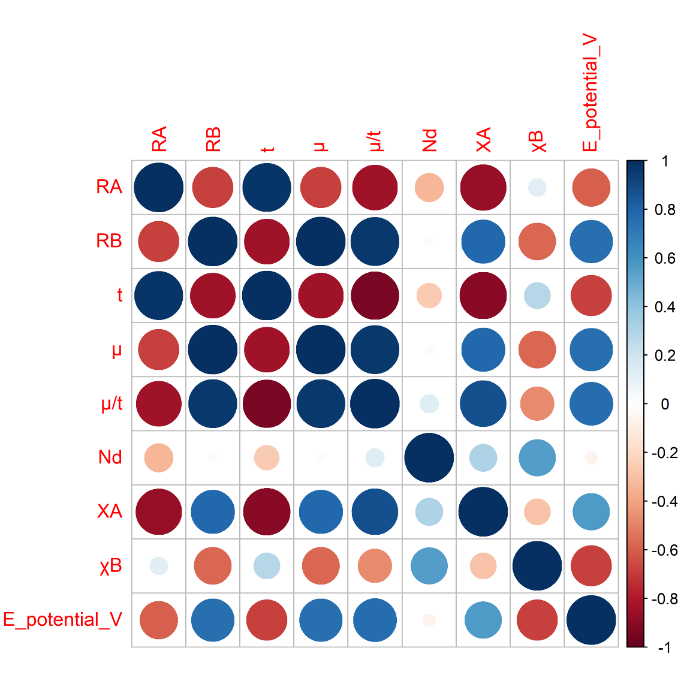


Supporting Figure 11. Correlation between features in the OER activity data set.


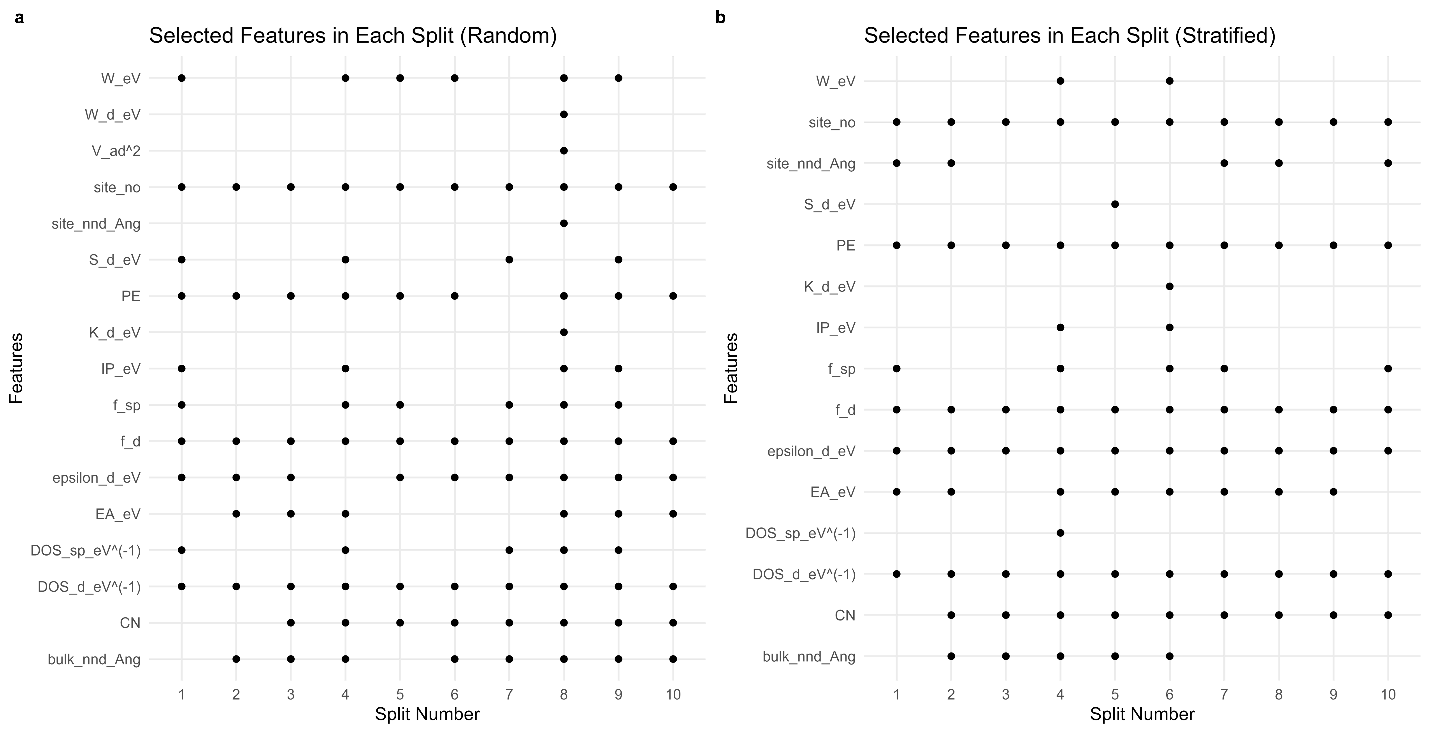


Supporting Figure 12. Variations in selected features with a) random, and b) stratified splitting methods for the adsorption energy dataset.


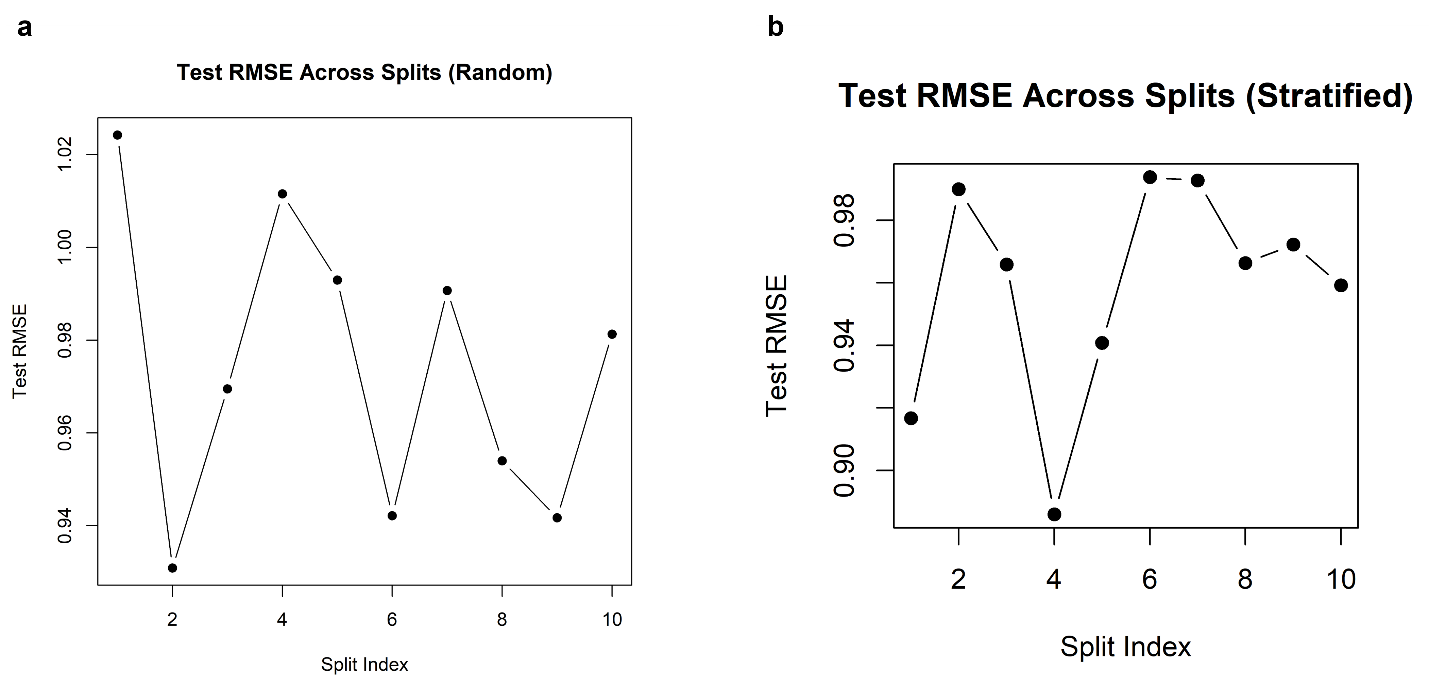


Supporting Figure 13. Variations in test RMSE with train-test splits for a) random, and b) stratified splits for the adsorption energy dataset.


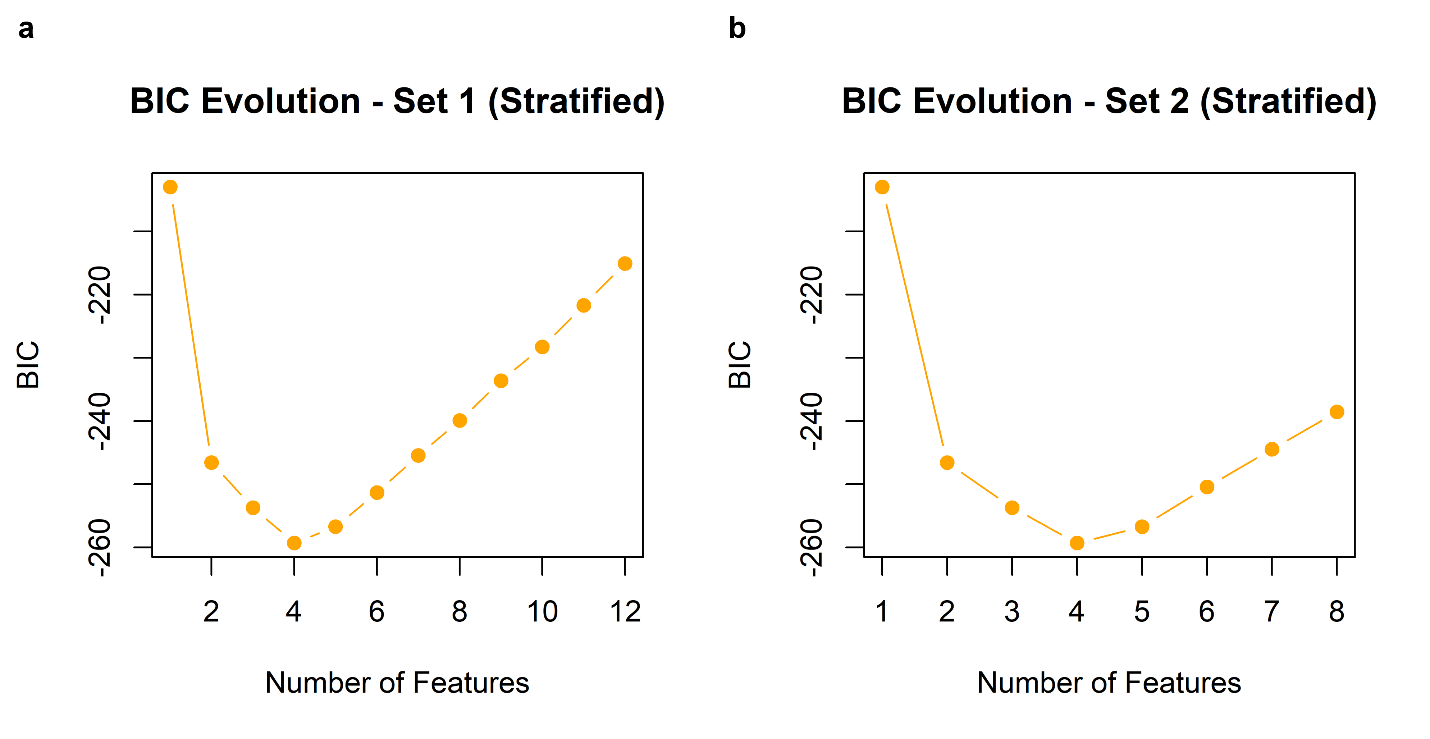


Supporting Figure 14. Bayesian information criterion estimates for a forward stepwise selection algorithm performed on stratified data splits for the adsorption energy dataset.


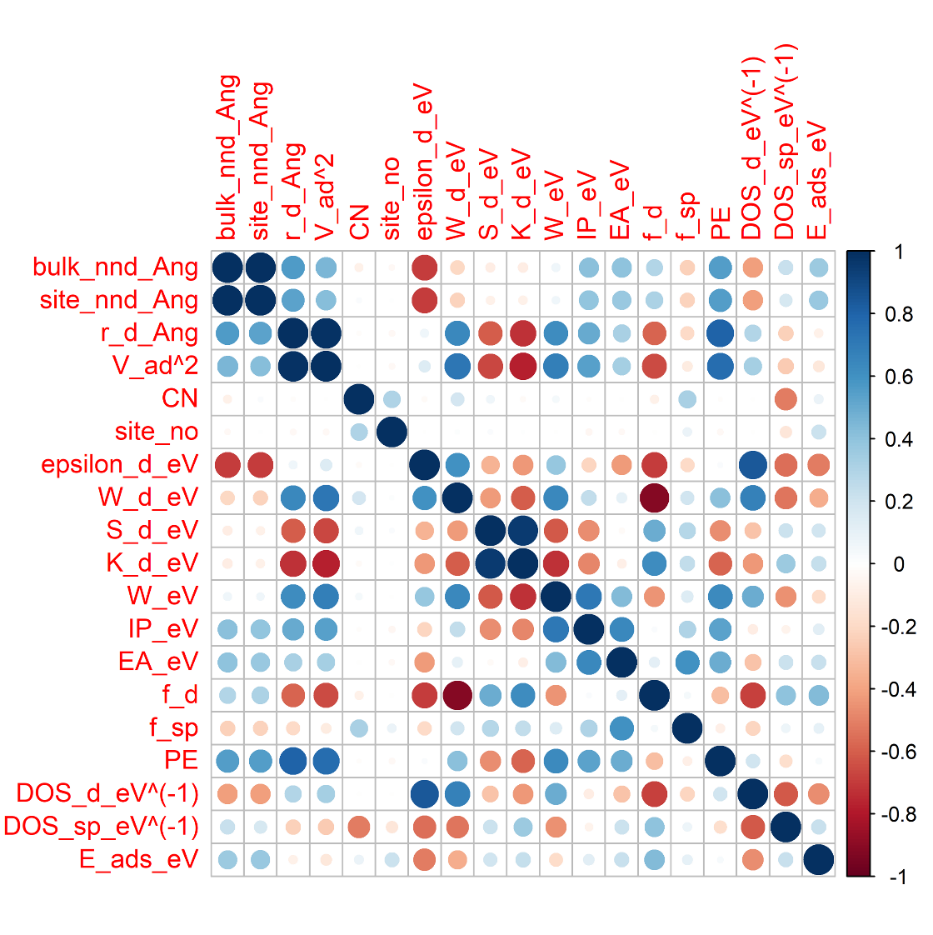


Supporting Figure 15. Correlation between features in the adsorption energy data set.


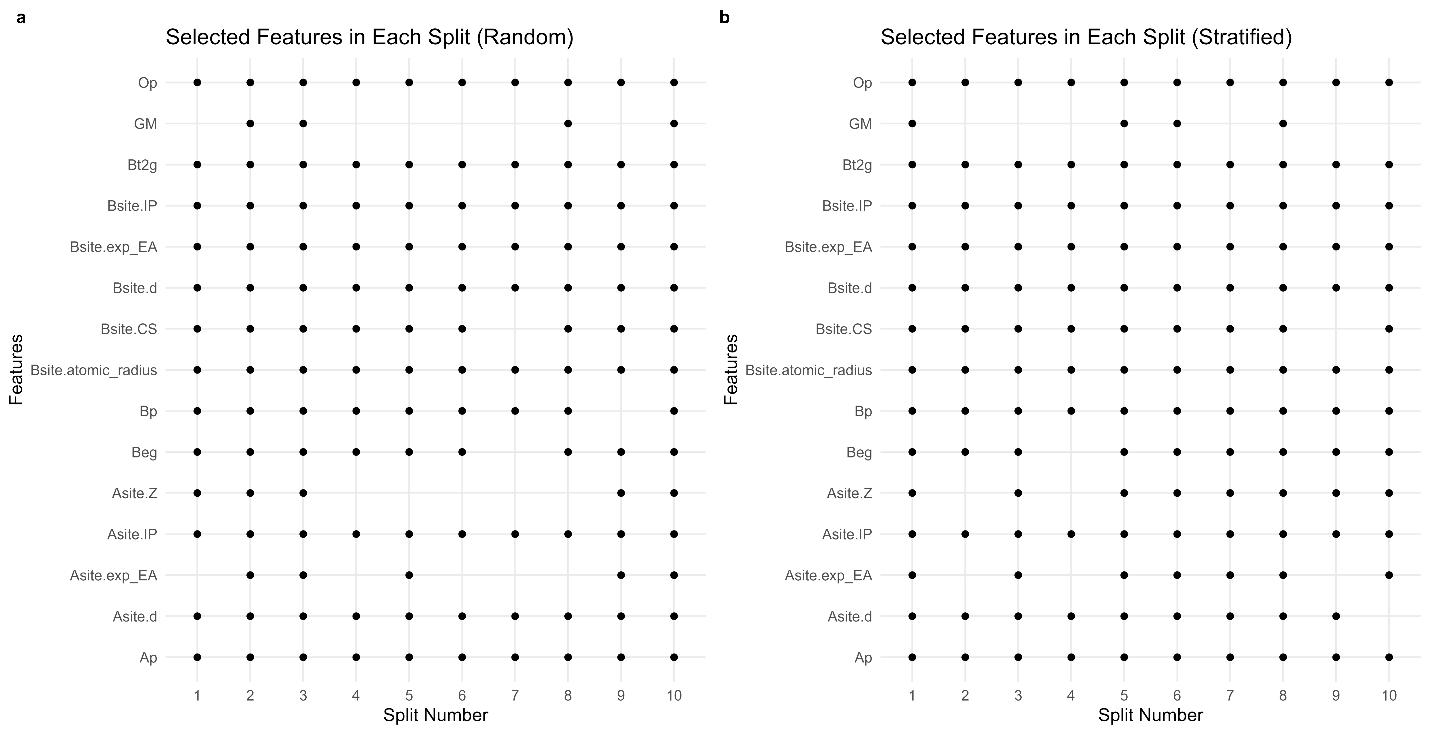


Supporting Figure 16. Variations in selected features with a) random, and b) stratified splitting methods for the work function dataset.


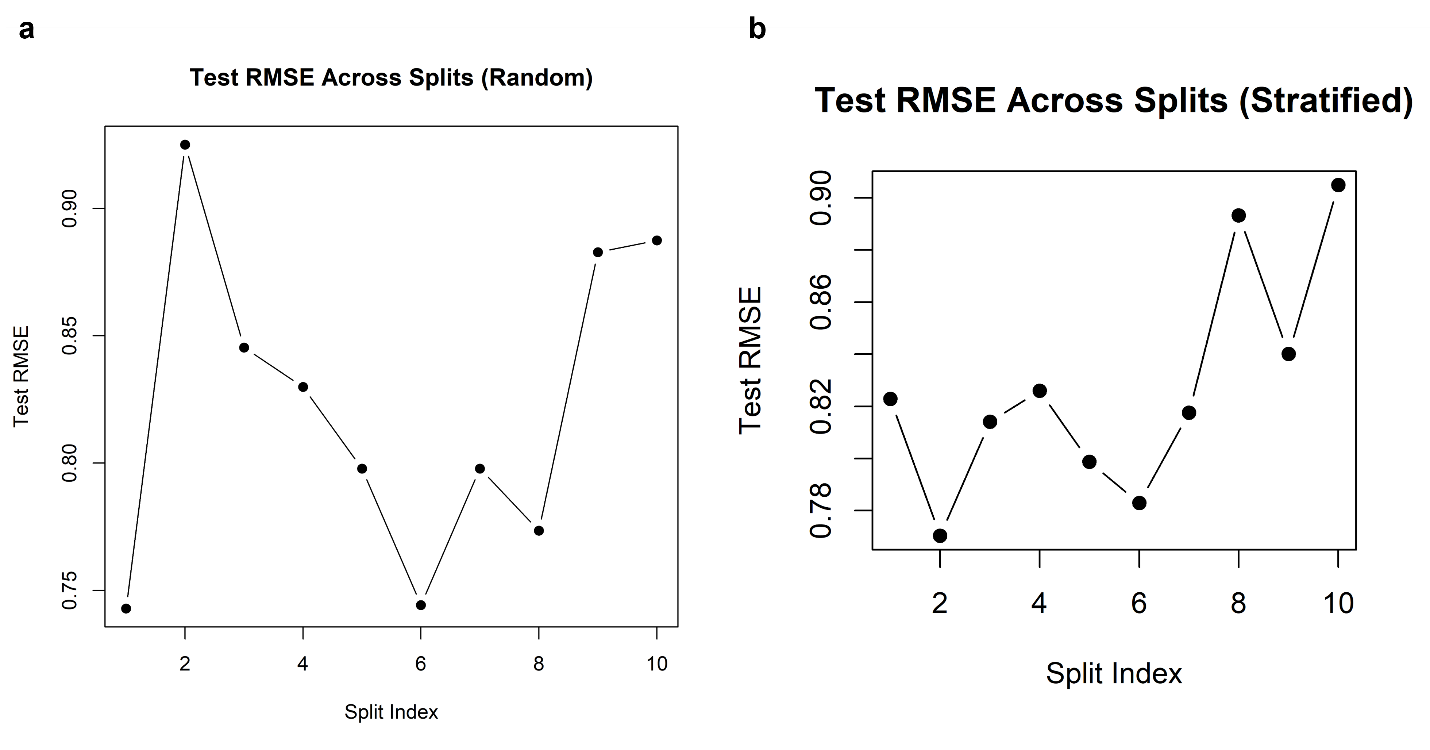


Supporting Figure 17. Variations in test RMSE with train-test splits for a) random, and b) stratified splits for the work function dataset.


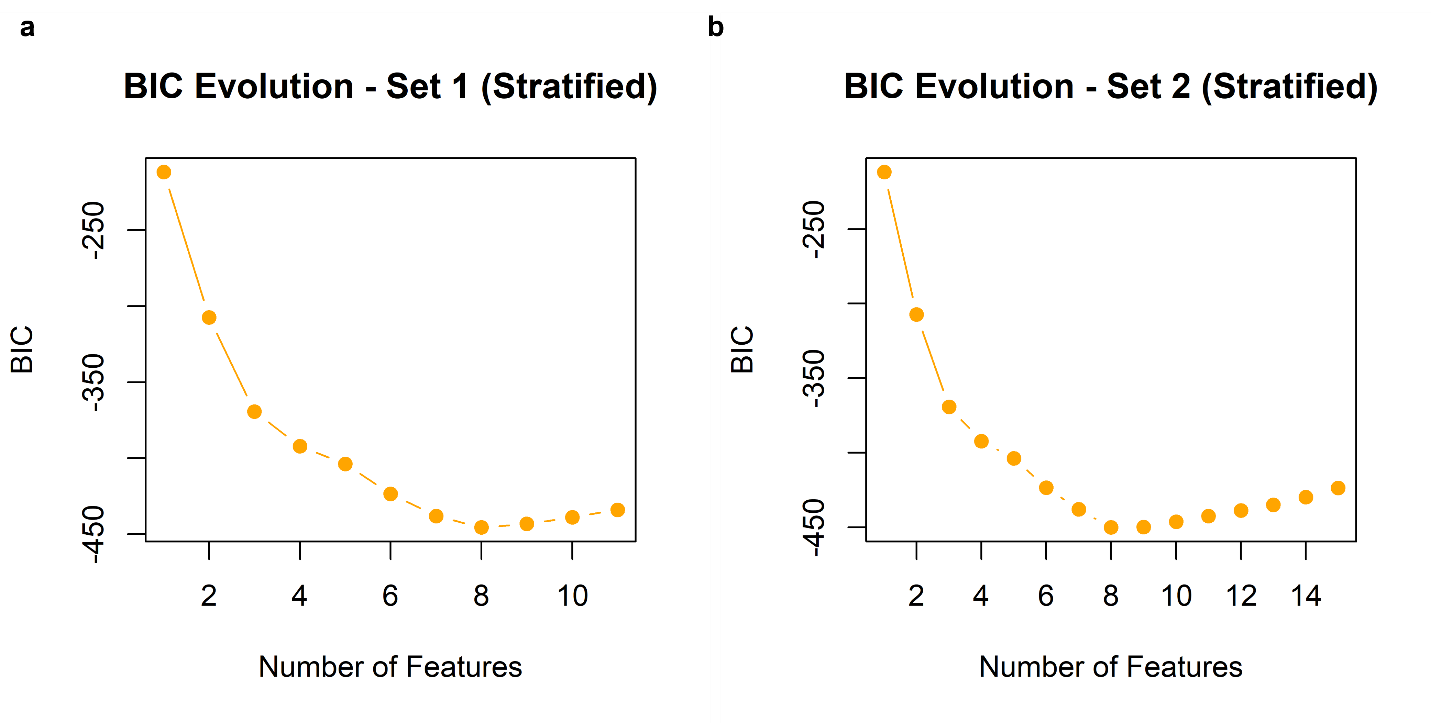


Supporting Figure 18. Bayesian information criterion estimates for a forward stepwise selection algorithm performed on stratified data splits for the work function dataset.


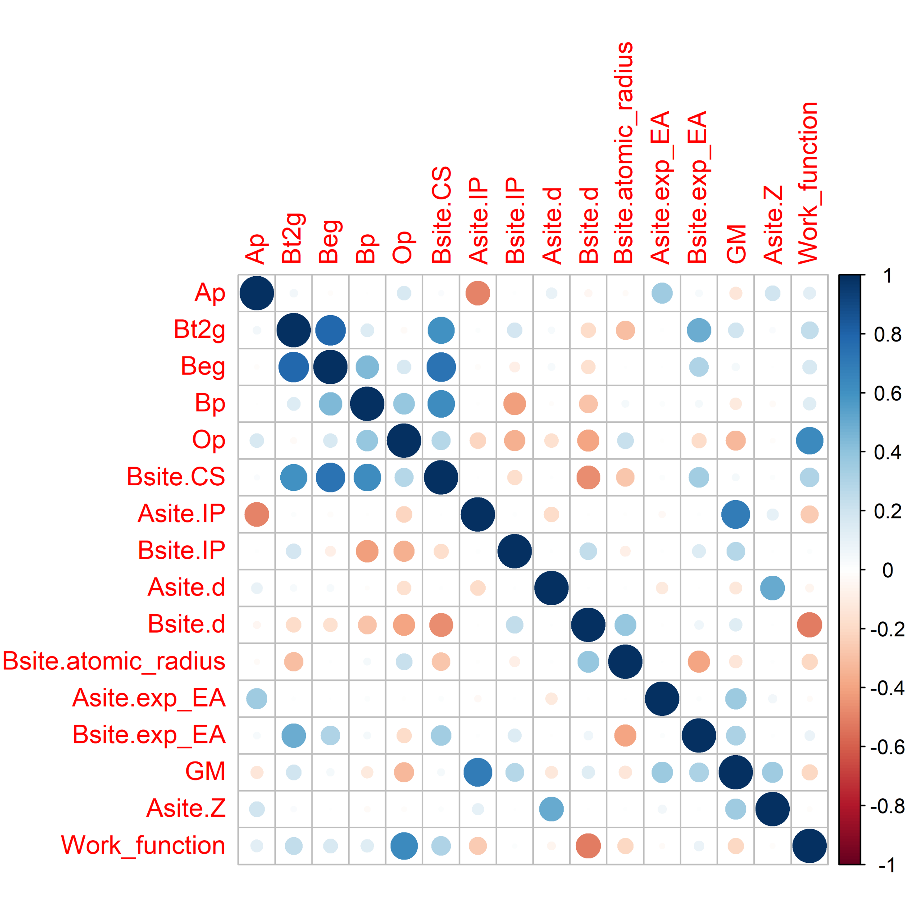


Supporting Figure 19. Correlation between features in the work function dataset


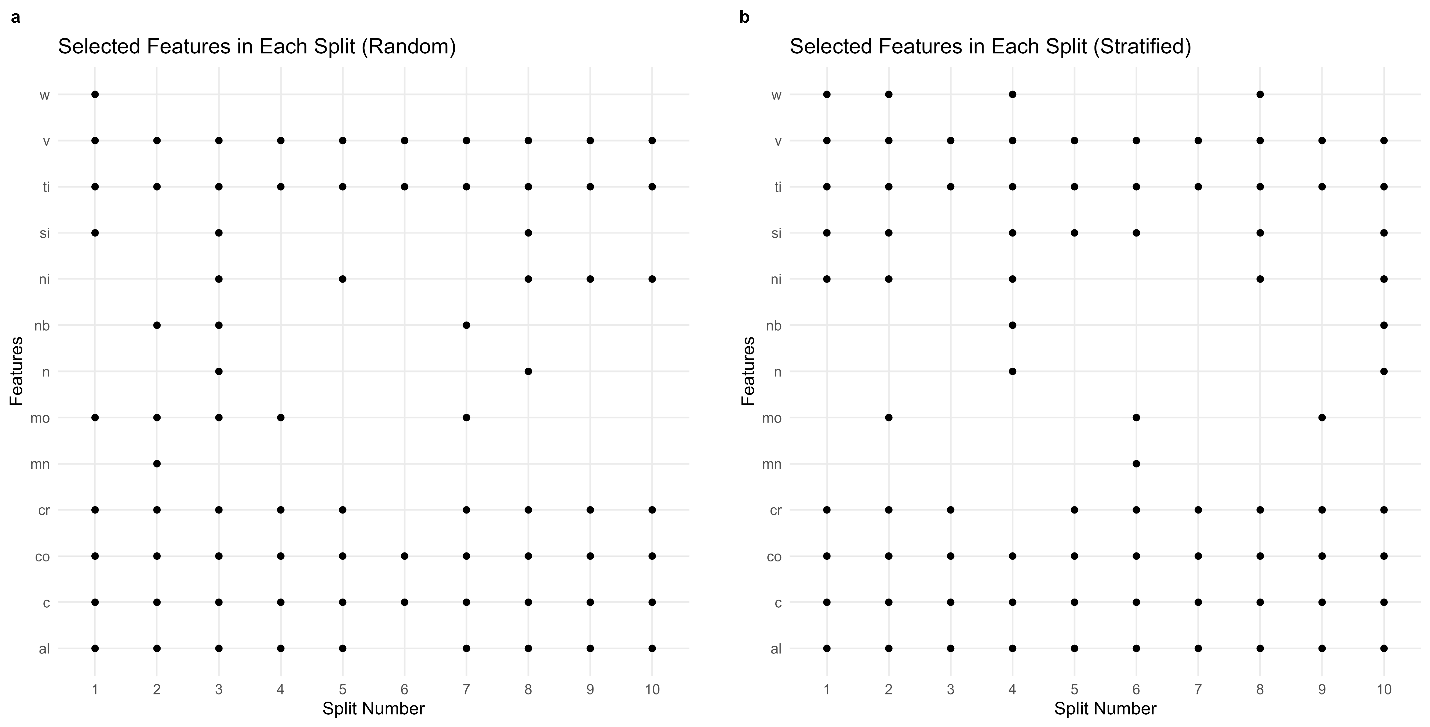


Supporting Figure 20. Variations in selected features with a) random, and b) stratified splitting methods for the steel strength dataset.


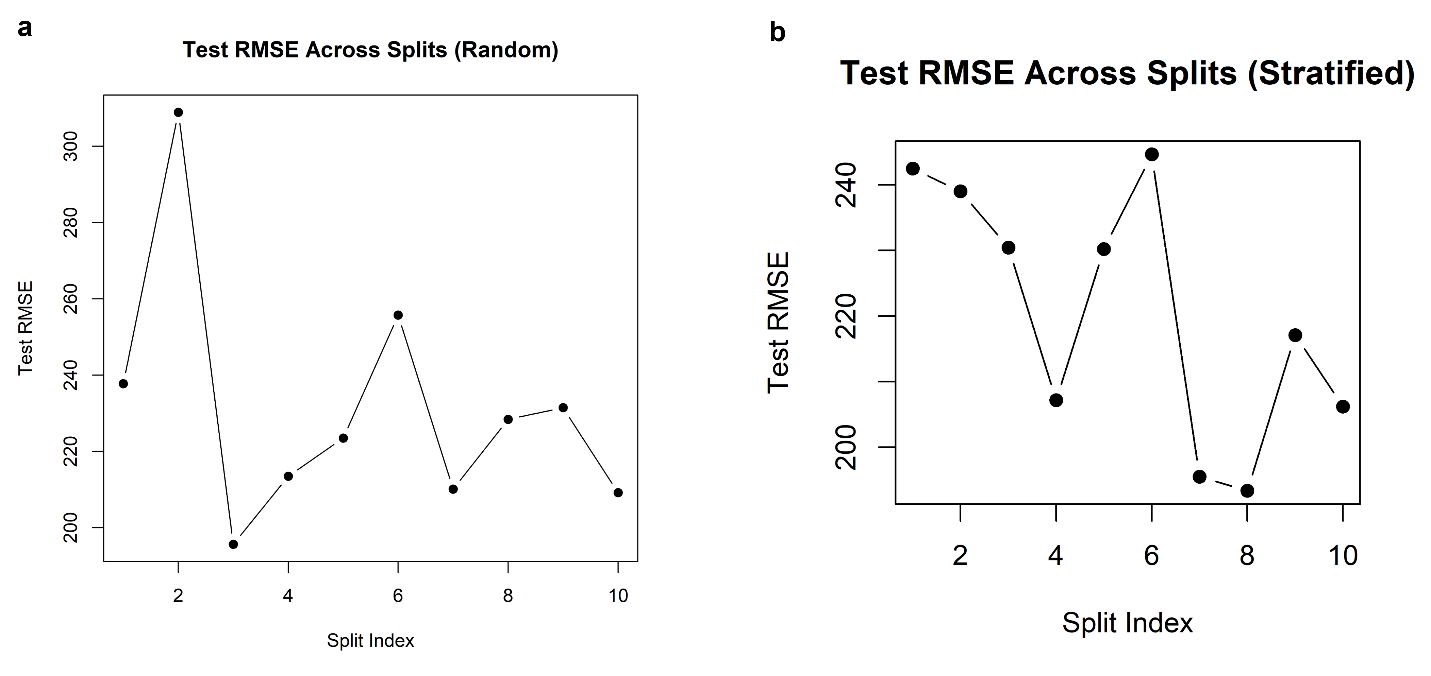


Supporting Figure 21. Variations in test RMSE with train-test splits for a) random, and b) stratified splits for the steel strength dataset.


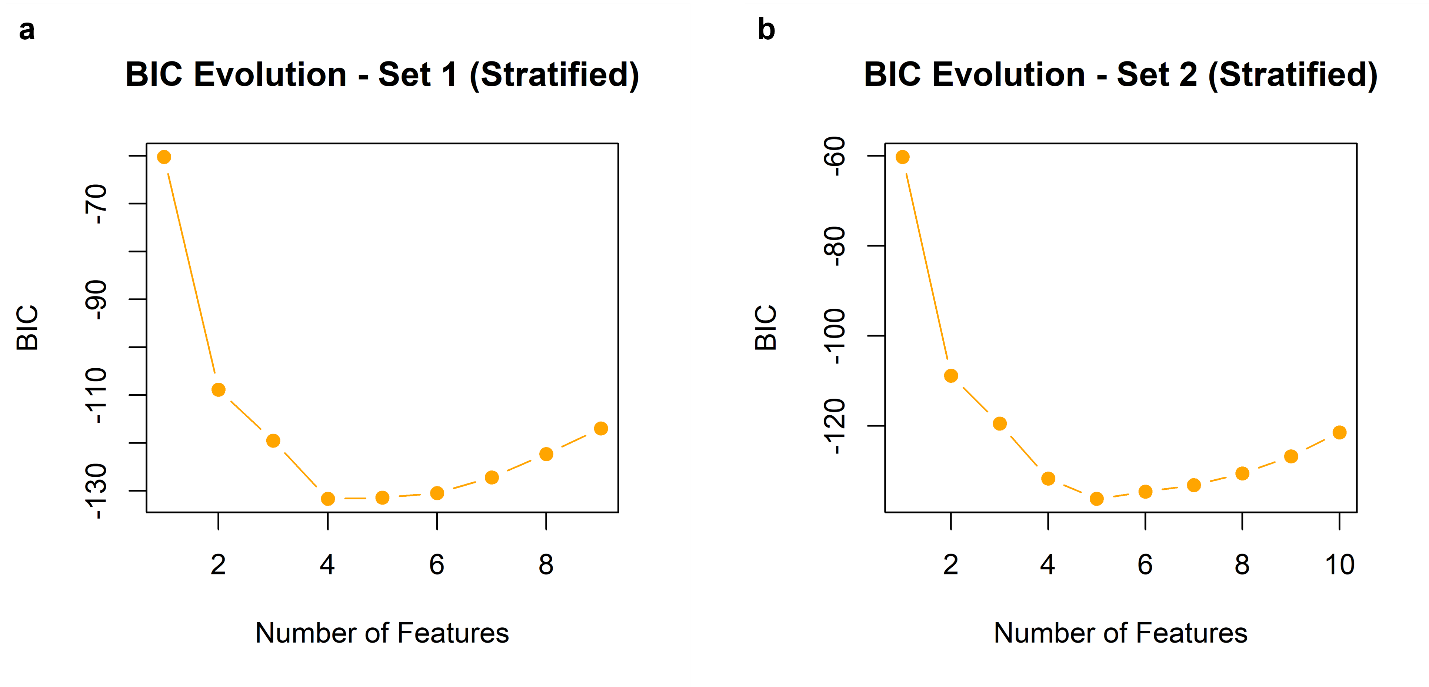


Supporting Figure 22. Bayesian information criterion estimates for a forward stepwise selection algorithm performed on stratified data splits for the steel strength dataset.


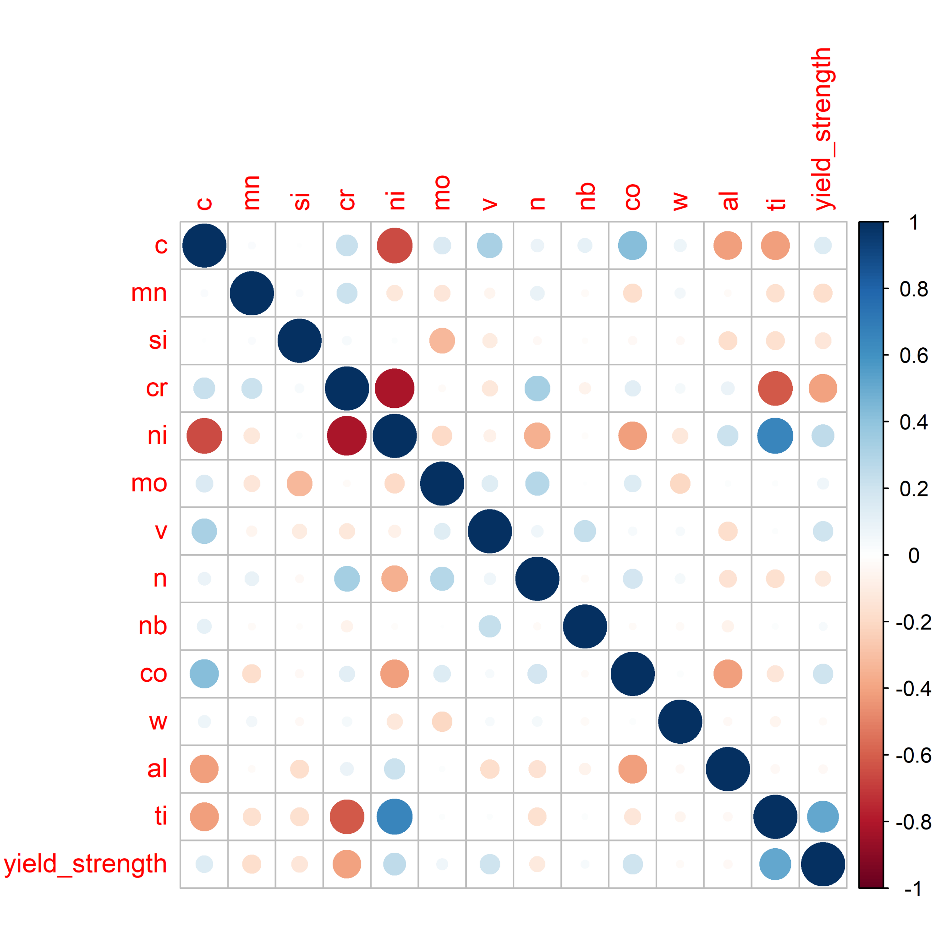


Supporting Figure 23. Correlation between features in the steel strength data set.


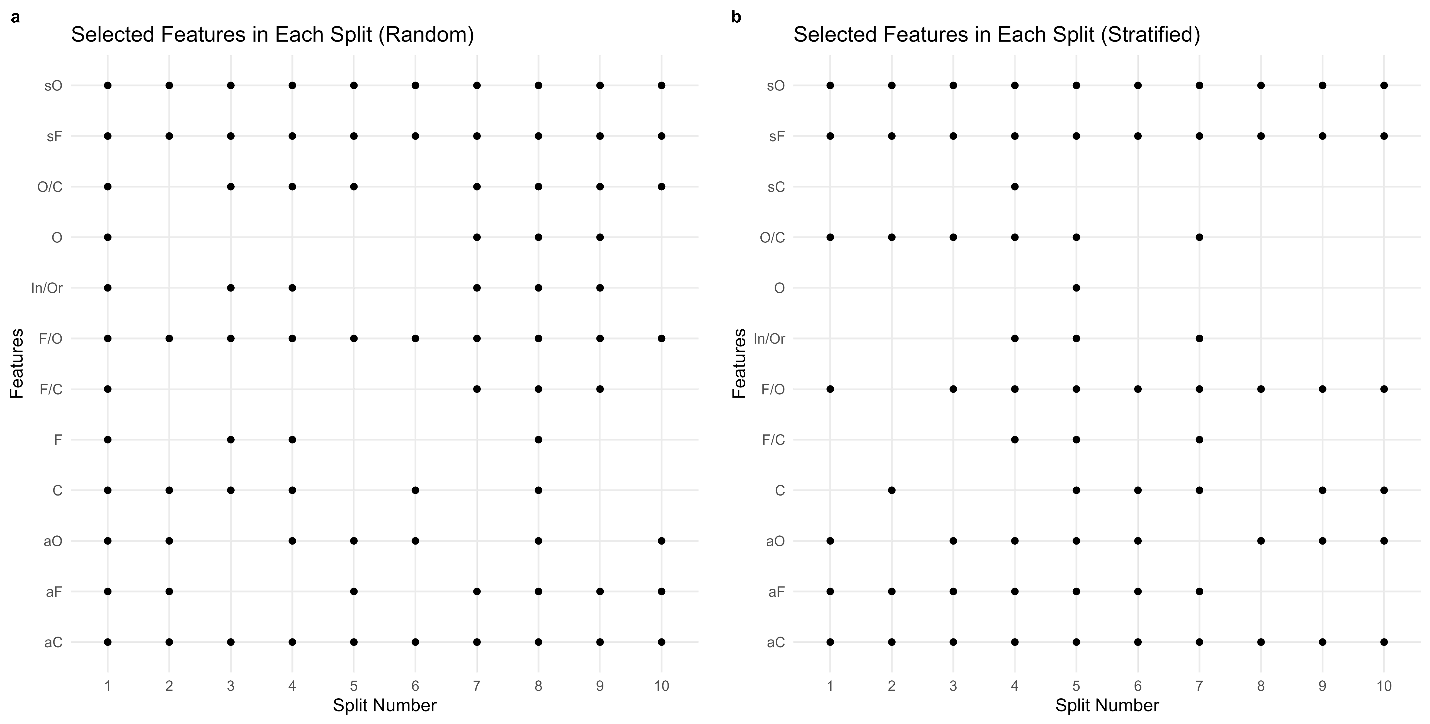


Supporting Figure 24. Variations in selected features with a) random, and b) stratified splitting methods for the battery efficiency dataset.


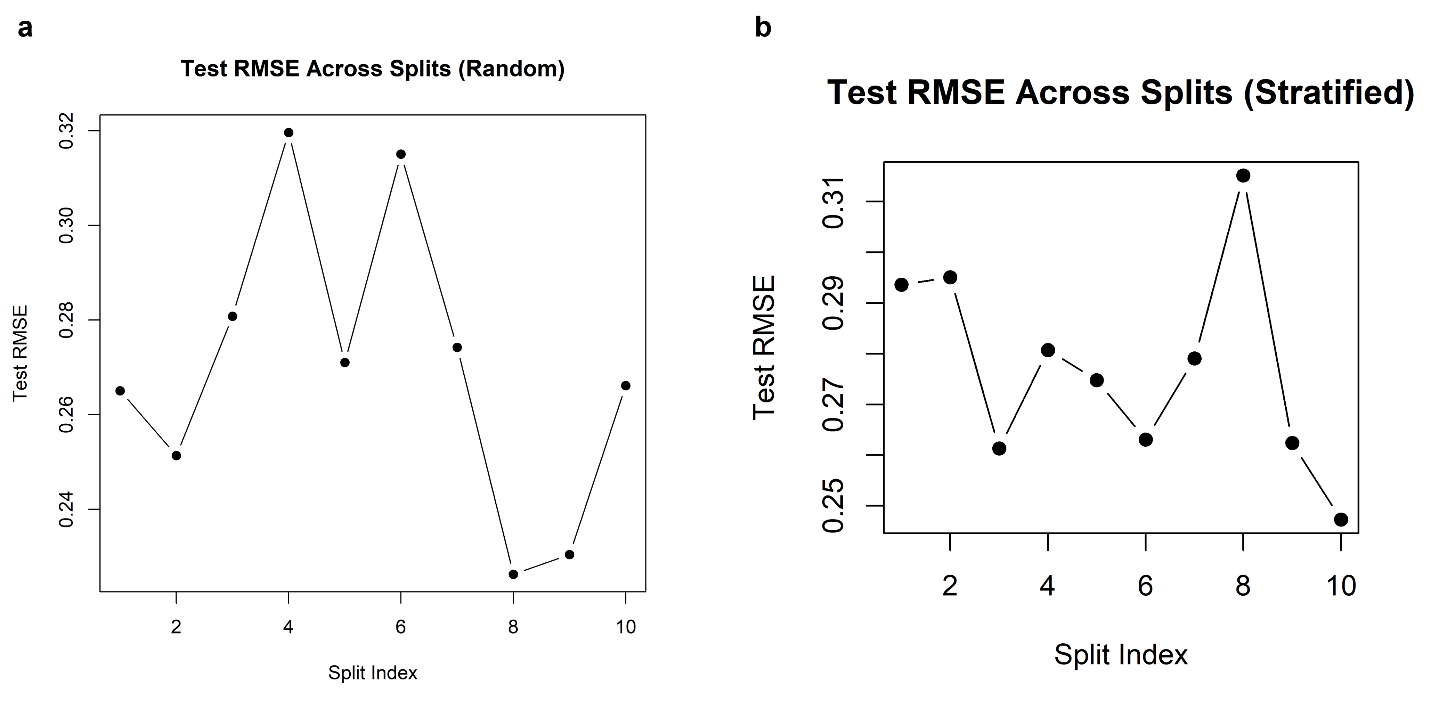


Supporting Figure 25. Variations in test RMSE with train-test splits for a) random, and b) stratified splits for the battery efficiency dataset.


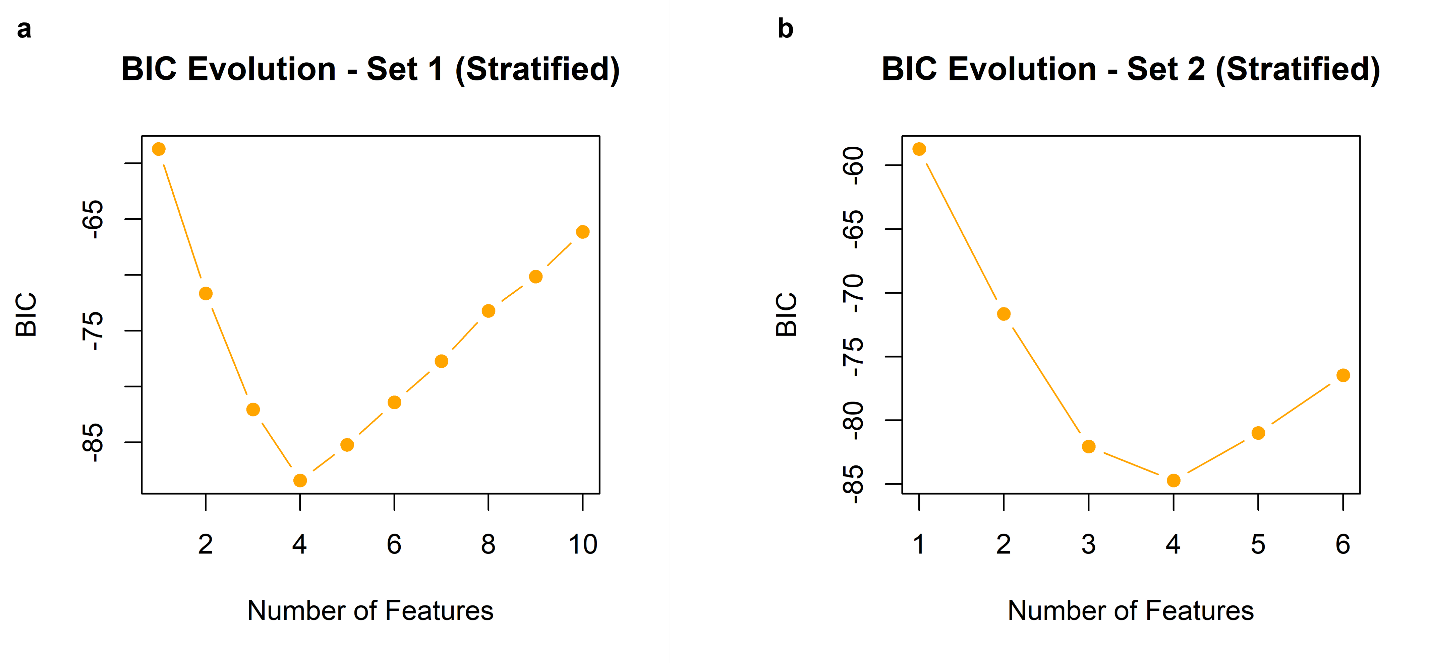


Supporting Figure 26. Bayesian information criterion estimates for a forward stepwise selection algorithm performed on stratified data splits for the battery efficiency dataset.


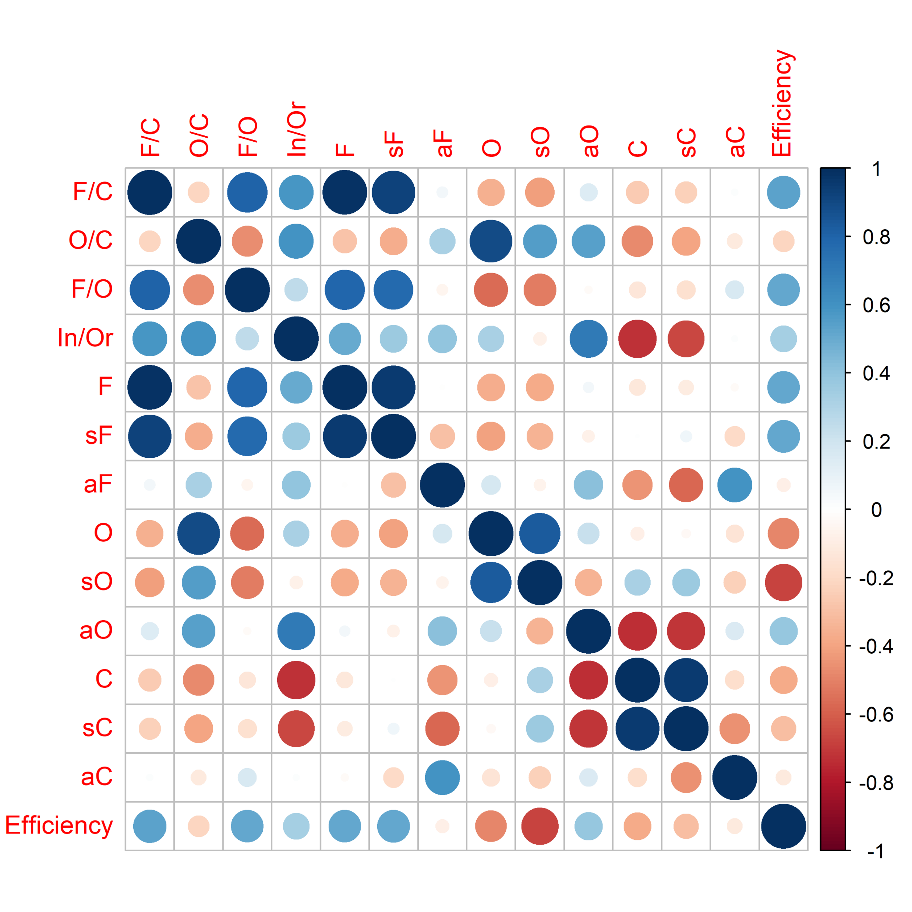


Supporting Figure 27. Correlation between features in the battery efficiency data set.

Supporting Table 1: Variable definition for the OER activity dataset

| **Variable** | **Definition** |
| --- | --- |
| rA | Weighted average ionic radius of cation A |
| rB | Weighted average ionic radius of cation B |
| rO | Ionic radius of O2- |
| χA | Electronegativity of A |
| χB | Electronegativity of B |
| QA | Weighted average charge state of cation A |
| Nd | Weighted average number of d electrons in B |
| µ | Octahedral factor = |
| t | Tolerance factor = |

Supporting Table 2: Variable definition for the adsorption energy dataset

| **Variable** | **Definition** |
| --- | --- |
| PE | Pauling electronegativity |
| IP | Ionization potential |
| EA | Electron affinity |
| bulknnd | Fcc nearest neighbor distance |
| rd | Radius of d-orbitals |
| W | Work function |
| siteno | Number of atoms in ensemble |
| CN | Coordination number |
| sitennd | Nearest neighbor distance |
| εd | d-band center |
| Wd | d-bandwidth |
| Sd | d-band skewness |
| Kd | d-band kurtosis |
| fd | d-band filling |
| fsp | sp-band filling |
| DOSd | Density of d-states at Fermi level |
| DOSsp | Density of sp-states at Fermi level |

Supporting Table 3: Variable definition for the work function dataset

| **Variable** | **Definition** |
| --- | --- |
| IPext, EAexpt | Experimental ionization potential and electron affinity |
| IPcalc, EAcalc | Calculated ionization potential and electron affinity |
| χP | Pauling electronegativity |
| δ | Bonding covalency with oxygen |
| rs, rp, rd | s, p and d valence orbital radii of the element |
| Ratm, Rion | Atomic radii and average ionic radii |
| ᵱ | Pettifor’s chemical scale |
| Z | Atomic number |
| ᴍ | Mendeleev number |
| Ep | P band center in bulk perovskite |
| θd, θeg, θt2g | Filling factor of d band, eg and t2g in bulk perovskite |
| E2p | Center of oxygen 2p band in bulk perovskite |
| χM | Geometric mean of the electronegativity of the perovskite constituents on a Mulliken scale |

Supporting Table 4: Variable definition for the battery efficiency dataset

| **Feature** | **Abbreviation** | **Description** |
| --- | --- | --- |
| Oxygen Ratio | O% | Molar fraction of oxygen in entire electrolyte volume. |
| Solvent Oxygen Ratio | sO | Molar fraction of oxygen in solvents in entire electrolyte volume. |
| Anion Oxygen Ratio | aO | Molar fraction of oxygen in anion in entire electrolyte volume. |
| Carbon Ratio | C% | Molar fraction of carbon in entire electrolyte volume. |
| Solvent Carbon Ratio | sC | Molar fraction of carbon in solvents in entire electrolyte volume. |
| Anion Carbon Ratio | aC | Molar fraction of carbon in anion in entire electrolyte volume. |
| Fluorine Ratio | F% | Molar fraction of fluorine in entire electrolyte volume. |
| Solvent Fluorine Ratio | sF | Molar fraction of fluorine in solvents in entire electrolyte volume. |
| Anion Fluorine Ratio | aF | Molar fraction of fluorine in anion in entire electrolyte volume. |
| Fluorine/Oxygen Ratio | F/O | Molar ratio of fluorine to oxygen |
| Fluorine/Carbon Ratio | F/C | Molar ratio of fluorine to carbon |
| Oxygen/Carbon Ratio | O/C | Molar ratio of oxygen to carbon |
| Inorganic/Organic Ratio | InOr | Molar ratio of elements excluding carbon, hydrogen, and lithium (inorganics) to carbon (organics). |
